# Supplementary material for: Lower Amounts of Daily and Prolonged Sitting Do Not Lower Free-Living Continuously Monitored Glucose Concentrations in Overweight and Obese Adults: A Randomised Crossover Study
Source: MDPI journal article supplement (doi:10.3390/nu14030605), 2022-01-30
Supplement: s1 [file s1]

Table S1. CONSORT 2010 checklist of information to include when reporting a randomised trial.

| Section/Topic                    | Item No | Checklist Item                                                                                                                                                                              | Reported on Page No |
|----------------------------------|---------|---------------------------------------------------------------------------------------------------------------------------------------------------------------------------------------------|---------------------|
| <b>Title and abstract</b>        |         |                                                                                                                                                                                             |                     |
|                                  | 1a      | Identification as a randomised trial in the title                                                                                                                                           | 1                   |
|                                  | 1b      | Structured summary of trial design, methods, results, and conclusions                                                                                                                       | 1                   |
| <b>Introduction</b>              |         |                                                                                                                                                                                             |                     |
| Background and objectives        | 2a      | Scientific background and explanation of rationale                                                                                                                                          | 1–2                 |
|                                  | 2b      | Specific objectives or hypotheses                                                                                                                                                           | 2                   |
| <b>Methods</b>                   |         |                                                                                                                                                                                             |                     |
| Trial design                     | 3a      | Description of trial design (such as parallel, factorial) including allocation ratio                                                                                                        | 2-3                 |
|                                  | 3b      | Important changes to methods after trial commencement (such as eligibility criteria), with reasons                                                                                          | N/A                 |
| Participants                     | 4a      | Eligibility criteria for participants                                                                                                                                                       | 3                   |
|                                  | 4b      | Settings and locations where the data were collected                                                                                                                                        | 3                   |
| Interventions                    | 5       | The interventions for each group with sufficient details to allow replication, including how and when they were actually administered                                                       | 3-5                 |
| Outcomes                         | 6a      | Completely defined pre-specified primary and secondary outcome measures, including how and when they were assessed                                                                          | 5                   |
|                                  | 6b      | Any changes to trial outcomes after the trial commenced, with reasons                                                                                                                       | N/A                 |
| Sample size                      | 7a      | How sample size was determined                                                                                                                                                              | 3                   |
|                                  | 7b      | When applicable, explanation of any interim analyses and stopping guidelines                                                                                                                | N/A                 |
| Randomisation:                   |         |                                                                                                                                                                                             |                     |
| Sequence generation              | 8a      | Method used to generate the random allocation sequence                                                                                                                                      | 3                   |
|                                  | 8b      | Type of randomisation; details of any restriction (such as blocking and block size)                                                                                                         | 3                   |
| Allocation concealment mechanism | 9       | Mechanism used to implement the random allocation sequence (such as sequentially numbered containers), describing any steps taken to conceal the sequence until interventions were assigned | 3                   |
| Implementation                   | 10      | Who generated the random allocation sequence, who enrolled participants, and who assigned participants to interventions                                                                     | 3                   |
| Blinding                         | 11a     | If done, who was blinded after assignment to interventions (for example, participants, care providers, those assessing outcomes) and how                                                    | N/A                 |

|                                                      |     |                                                                                                                                                   |          |
|------------------------------------------------------|-----|---------------------------------------------------------------------------------------------------------------------------------------------------|----------|
| Statistical methods                                  | 11b | If relevant, description of the similarity of interventions                                                                                       | N/A      |
|                                                      | 12a | Statistical methods used to compare groups for primary and secondary outcomes                                                                     | 6        |
|                                                      | 12b | Methods for additional analyses, such as subgroup analyses and adjusted analyses                                                                  | N/A      |
| <b>Results</b>                                       |     |                                                                                                                                                   |          |
| Participant flow (a diagram is strongly recommended) | 13a | For each group, the numbers of participants who were randomly assigned, received intended treatment, and were analysed for the primary outcome    | Figure 2 |
| Recruitment                                          | 13b | For each group, losses and exclusions after randomisation, together with reasons                                                                  | Figure 2 |
|                                                      | 14a | Dates defining the periods of recruitment and follow-up                                                                                           | 6        |
| Baseline data                                        | 14b | Why the trial ended or was stopped                                                                                                                | N/A      |
|                                                      | 15  | A table showing baseline demographic and clinical characteristics for each group                                                                  | Table 1  |
| Numbers analysed                                     | 16  | For each group, number of participants (denominator) included in each analysis and whether the analysis was by original assigned groups           | 6        |
| Outcomes and estimation                              | 17a | For each primary and secondary outcome, results for each group, and the estimated effect size and its precision (such as 95% confidence interval) | 6–8      |
|                                                      | 17b | For binary outcomes, presentation of both absolute and relative effect sizes is recommended                                                       | N/A      |
| Ancillary analyses                                   | 18  | Results of any other analyses performed, including subgroup analyses and adjusted analyses, distinguishing pre-specified from exploratory         | N/A      |
| Harms                                                | 19  | All important harms or unintended effects in each group (for specific guidance see CONSORT for harms)                                             | N/A      |
| <b>Discussion</b>                                    |     |                                                                                                                                                   |          |
| Limitations                                          | 20  | Trial limitations, addressing sources of potential bias, imprecision, and, if relevant, multiplicity of analyses                                  | 10       |
| Generalisability                                     | 21  | Generalisability (external validity, applicability) of the trial findings                                                                         | 8–10     |
| Interpretation                                       | 22  | Interpretation consistent with results, balancing benefits and harms, and considering other relevant evidence                                     | 8–10     |
| <b>Other information</b>                             |     |                                                                                                                                                   |          |
| Registration                                         | 23  | Registration number and name of trial registry                                                                                                    | N/A      |
| Protocol                                             | 24  | Where the full trial protocol can be accessed, if available                                                                                       | N/A      |
| Funding                                              | 25  | Sources of funding and other support (such as supply of drugs), role of funders                                                                   | N/A      |

**Table S2.** Sitting, standing and stepping outcomes across the experimental regimen days ( $n = 12$ ).

|                                                           | Uninterrupted Sitting   |                         |                         |                         | Interrupted Sitting        |                          |                          |                          |
|-----------------------------------------------------------|-------------------------|-------------------------|-------------------------|-------------------------|----------------------------|--------------------------|--------------------------|--------------------------|
|                                                           | Day 1                   | Day 2                   | Day 3                   | Day 4                   | Day 1                      | Day 2                    | Day 3                    | Day 4                    |
| Daily sitting time (min/day) *                            | 674.2<br>(581.8, 766.5) | 665.1<br>(572.7, 757.5) | 695.3<br>(602.8, 787.7) | 650.1<br>(557.7, 742.5) | 599.9<br>(507.5, 692.4)    | 616.7<br>(524.2, 709.1)  | 632.7<br>(539.4, 726.1)  | 604.7<br>(510.8, 698.6)  |
| Time in short 0-30 min sitting bouts (min/day) *          | 278.2<br>(211.4, 345.0) | 273.8<br>(207.1, 340.7) | 279.3<br>(212.5, 346.2) | 307.9<br>(241.1, 374.7) | 309.7<br>(242.9, 376.6)    | 338.8<br>(271.9, 405.7)  | 344.0<br>(275.6, 412.3)  | 335.0<br>(265.7, 404.4)  |
| Time in prolonged $\geq 30$ min sitting bouts (min/day) * | 395.9<br>(306.7, 485.0) | 390.7<br>(301.5, 479.9) | 415.1<br>(325.8, 504.3) | 341.8<br>(252.7, 431.0) | 310.6<br>(221.4, 399.9)    | 276.8<br>(187.5, 366.1)  | 287.1<br>(195.8, 378.4)  | 271.7<br>(179.2, 364.2)  |
| Time in prolonged $\geq 60$ min sitting bouts (min/day) * | 202.0<br>(111.2, 292.7) | 202.0<br>(111.2, 292.7) | 248.8<br>(157.9, 339.6) | 207.2<br>(116.5, 298.1) | 134.7<br>(43.9, 225.6)     | 58.3<br>(-32.6, 149.3)   | 75.6<br>(-18.8, 149.3)   | 107.0<br>(11.0, 202.9)   |
| Sit-upright transitions ( $n$ )                           | 49.8<br>(42.8, 56.7)    | 48.2<br>(41.2, 55.1)    | 50.5<br>(43.5, 57.4)    | 52.3<br>(45.3, 59.2)    | 48.4<br>(41.4, 55.4)       | 54.3<br>(47.3, 61.3)     | 54.3<br>(47.1, 61.5)     | 51.4<br>(44.0, 58.7)     |
| Short sitting bouts ( $n$ )                               | 42.5<br>(34.9, 50.1)    | 41.3<br>(33.7, 48.8)    | 43.7<br>(36.1, 51.3)    | 47.0<br>(39.4, 54.5)    | 42.8<br>(35.2, 50.4)       | 47.8<br>(40.2, 55.4)     | 48.1<br>(40.3, 55.9)     | 45.6<br>(37.6, 53.5)     |
| Prolonged $\geq 30$ min sitting bouts ( $n$ )             | 7.3 (5.7, 9.0)          | 7.2 (5.5, 8.8)          | 6.9 (5.3, 8.5)          | 5.6 (4.0, 7.3)          | 5.7 (4.1, 7.3)             | 6.7 (5.0, 8.3)           | 6.5 (4.8, 8.1)           | 5.9 (4.2, 7.6)           |
| Prolonged $\geq 60$ min sitting bouts ( $n$ ) *           | 2.6 (1.6, 3.6)          | 2.4 (1.3, 3.4)          | 2.9 (1.8, 3.9)          | 2.4 (1.4, 3.4)          | 1.2 (0.2, 2.2)             | 0.7 (-0.3, 1.7)          | 0.8 (-0.2, 1.9)          | 1.4 (0.4, 2.5)           |
| Standing time (min/day)                                   | 233.0<br>(147.5, 318.4) | 238.4<br>(152.9, 323.8) | 214.8<br>(129.4, 300.3) | 258.1<br>(172.6, 343.5) | 265.0<br>(179.5, 350.5)    | 252.0<br>(166.5, 337.4)  | 239.4<br>(153.2, 325.6)  | 259.9<br>(173.2, 346.6)  |
| Stepping time (min/day) *                                 | 81.1<br>(60.8, 101.3)   | 84.7<br>(64.4, 104.9)   | 78.0<br>(57.8, 98.3)    | 80.0<br>(59.8, 100.3)   | 123.3<br>(103.0, 143.6)    | 119.4<br>(99.1, 139.7)   | 116.2<br>(95.4, 137.1)   | 124.2<br>(103.0, 145.4)  |
| Total steps ( $n$ ) *                                     | 7303<br>(5300, 9305)    | 7328<br>(5324, 9331)    | 6567<br>(4562, 8573)    | 6567<br>(4564, 8570)    | 12,592<br>(10,586, 14,597) | 10,321<br>(8314, 12,328) | 10,354<br>(8280, 12,429) | 10,682<br>(8573, 12,792) |

Data displayed as mean (95% confidence interval) \*Significant main effect of experimental regimen.

**Table S3.** Glycaemic responses across the experimental regimen days ( $n = 12$ ).

|                                         | Uninterrupted Sitting |                      |                      |                      | Interrupted Sitting  |                      |                      |                      |
|-----------------------------------------|-----------------------|----------------------|----------------------|----------------------|----------------------|----------------------|----------------------|----------------------|
|                                         | Day 1                 | Day 2                | Day 3                | Day 4                | Day 1                | Day 2                | Day 3                | Day 4                |
| <b>24-h period</b>                      |                       |                      |                      |                      |                      |                      |                      |                      |
| Mean glucose concentration (mmol/L)     | 5.7 (5.2, 6.2)        | 5.5 (5.0, 6.0)       | 5.7 (5.2, 6.2)       | 5.7 (5.2, 6.2)       | 5.5 (5.0, 6.0)       | 5.6 (5.1, 6.1)       | 5.6 (5.1, 6.1)       | 5.6 (5.1, 6.1)       |
| Glucose total AUC (mmol/L·24 h)         | 131.8 (120.3, 143.3)  | 124.4 (112.9, 135.9) | 134.6 (123.1, 146.2) | 136.7 (125.1, 148.2) | 136.5 (124.5, 148.5) | 133.9 (122.3, 145.4) | 131.9 (120.4, 143.4) | 136.8 (125.3, 148.3) |
| Glucose net iAUC (mmol/L·24 h)          | 4.2 (-3.6, 12.1)      | 7.2 (-0.7, 15)       | 5.9 (-2, 13.7)       | 6.2 (-1.7, 14)       | 6.9 (-1.1, 14.8)     | 5.2 (-2.6, 13.1)     | 4 (-3.8, 11.9)       | 6.1 (-1.7, 14)       |
| Coefficient of variation, %             | 19.3 (16.4, 22.1)     | 19.6 (16.8, 22.3)    | 20.5 (17.7, 23.2)    | 16.8 (14.0, 19.7)    | 19.7 (16.6, 22.7)    | 19.7 (16.8, 22.5)    | 19.1 (16.3, 22.0)    | 16.8 (14.0, 19.7)    |
| <b>Waking hours</b>                     |                       |                      |                      |                      |                      |                      |                      |                      |
| Mean glucose concentration (mmol/L)     | 5.7 (5.2, 6.2)        | 6.0 (5.5, 6.5)       | 5.9 (5.4, 6.4)       | 5.9 (5.4, 6.4)       | 5.6 (5.0, 6.1)       | 5.9 (5.3, 6.4)       | 5.8 (5.3, 6.4)       | 5.9 (5.4, 6.5)       |
| Glucose total AUC (mmol/L·waking hours) | 98.8 (89.8, 107.7)    | 103.8 (94.8, 112.7)  | 100.4 (91.4, 109.3)  | 101.7 (92.8, 110.7)  | 101.0 (91.9, 110.1)  | 100.6 (91.7, 109.6)  | 98.4 (89.5, 107.3)   | 100.8 (91.9, 109.7)  |
| Glucose net iAUC (mmol/L·waking hours)  | 5.4 (-0.7, 11.6)      | 7.7 (1.6, 13.8)      | 7.5 (1.4, 13.6)      | 6.6 (0.5, 12.7)      | 6.1 (-0.1, 12.4)     | 4.9 (-1.2, 11.0)     | 6.1 (0, 12.2)        | 5.2 (-0.9, 11.3)     |
| Coefficient of variation, %             | 21.3 (18.7, 23.9)     | 19.6 (17.0, 22.2)    | 19.3 (16.7, 21.9)    | 17.5 (14.9, 20.1)    | 21.3 (18.4, 24.2)    | 20.0 (17.2, 22.8)    | 19.9 (16.9, 22.8)    | 17.3 (14.1, 20.6)    |

Data displayed as mean (95% confidence interval). AUC, area under the curve; iAUC, net incremental area under the curve.
